# Supplementary material
Source: Springer Nature journal article supplement (https://www.springermedizin.de/resource/supplementary/12902_2014_312_MOESM3_ESM.pdf/9515938)
Supplement: MOESM3 [file 9515938]

# Experimental protocol

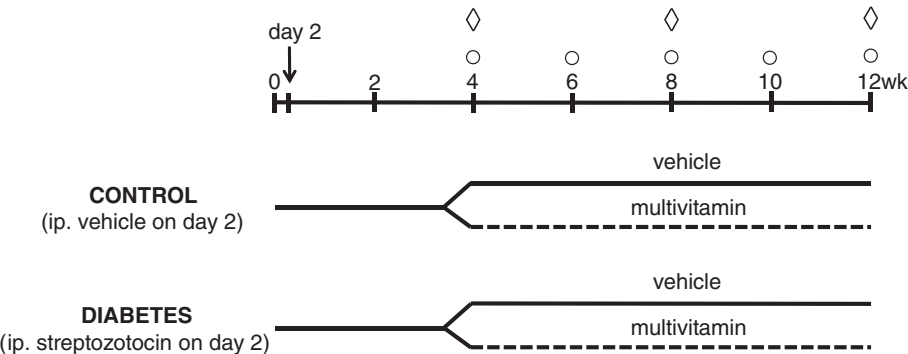

↓ ip. injection of streptozotocin or vehicle

○ body weight, serum glucose

◇ oral glucose tolerance test

● HbA1c and serum insulin
